# Supplementary material
Source: PubMed Central journal article supplement (PMC3059538)
Supplement: JBT_11_2201_003_Supplemental_Information.pdf [file JBT_11_2201_003_Supplemental_Information.pdf]

Supplemental Table 1. PRG07 Results Compilation

|                             |                      |                 |                 |                     |                   | Added Protein <sup>1</sup>          |           |               |                        |               |          |                 |                      |                |                |                  |            |
|-----------------------------|----------------------|-----------------|-----------------|---------------------|-------------------|-------------------------------------|-----------|---------------|------------------------|---------------|----------|-----------------|----------------------|----------------|----------------|------------------|------------|
|                             |                      |                 |                 |                     |                   | Myoglobin                           | Ubiquitin | Cyt. <i>c</i> | Horseradish peroxidase | Serum albumin | Catalase | Glucose oxidase | Carbonic anhydrase I | Trypto-phanase | Glycero-kinase | Lacto-peroxidase | Hexokinase |
| Quantity in sample B (pmol) |                      |                 |                 |                     |                   | 5.00                                | 23.00     | 11.50         | 11.00                  | 3.33          | 0.34     | 0.33            | 1.14                 | 1.56           | 0.78           | 0.78             | 0.16       |
| Quantity in sample A (pmol) |                      |                 |                 |                     |                   | 0.50                                | 5.00      | 2.50          | 5.00                   | 5.00          | 0.50     | 0.50            | 2.50                 | 5.00           | 2.50           | 2.50             | 0.50       |
| Ratio B/A                   |                      |                 |                 |                     |                   | 10.00                               | 4.60      | 4.60          | 2.20                   | 0.67          | 0.67     | 0.67            | 0.45                 | 0.31           | 0.31           | 0.31             | 0.31       |
| Identifier <sup>2</sup>     | No. Prot. identified | TP <sup>3</sup> | FP <sup>4</sup> | Method <sup>5</sup> | Days <sup>6</sup> | Percent error of ratio <sup>7</sup> |           |               |                        |               |          |                 |                      |                |                |                  |            |
| 67483                       | 10                   | 10 (6)          |                 | LF                  | 10                | 30.2                                | 0.7       | 10.9          | 12.3                   | 7.0           | -19.4    | -8.0            | -1.3                 |                |                | -12.9            | -316       |
| 19971v                      | 8                    | 8 (6)           | 1               | LF-hrSRM            | 9                 | 0.3                                 | -10.7     | -9.8          | -13.6                  | -26.0         | -7.5     |                 | -123                 |                |                | -148             |            |
| 29850                       | 8                    | 8 (7)           | 6 (2)           | iTRAQ               | 7                 | 50.9                                | 18.7      | 18.9          | 2.3                    | -11.0         | -16.3    |                 | -16.7                |                |                | -19.4            |            |
| 60752v                      | 9                    | 9 (9)           |                 | LF                  | 7                 | 10.9                                | 6.5       | -3.7          | 10.0                   | 22.0          | 29.9     | 28.0            | 18.5                 |                |                | 6.5              |            |
| 01606v                      | 6                    | 6 (5)           |                 | LF                  | 7                 | 13.3                                | 3.5       | -6.7          | -1.8                   | -17.0         |          |                 | -7.9                 |                |                |                  |            |
| 87037                       | 7                    | 6 (6)           | 5 (3)           | 18O                 | 5                 | 14.4                                | 25.4      | 27.0          | -6.8                   | -14.0         |          |                 |                      |                | -63.2          | -51.6            |            |
| 40318                       | 6                    | 6               |                 | 18O                 | 7                 | 38.4                                | -9.8      | 35.4          | 3.6                    | 11.5          |          |                 | -299                 |                |                |                  |            |
| 38057                       | 7                    | 7               |                 | iTRAQ               | 5                 | 55.6                                | 41.7      | 42.0          | 24.5                   | -20.0         | 4.5      |                 | -41.0                |                |                |                  |            |
| 27960v                      | 4                    | 4 (3)           |                 | ICPL                | 10                |                                     | -17.2     |               | -17.7                  | -18.5         |          |                 | -23.3                |                |                |                  |            |
| 00715                       | 6                    | 6 (4)           | 4 (3)           | 2D-S                |                   | 93.6                                | 46.1      | 78.9          |                        | -48.5         |          |                 | -1.3                 |                |                | 6.5              |            |
| 13036                       | 6                    | 6 (5)           | 2               | iTRAQ               | 10                | 75.4                                | 40.2      | 42.0          | 26.8                   | -15.5         |          |                 | -10.1                |                |                |                  |            |
| 78544                       | 6                    | 6 (6)           | 2               | DIGE                | 2                 | 97.2                                | 92.2      |               | 69.5                   | -112          | -7.5     |                 | -294                 |                |                |                  |            |
| 66639                       | 5                    | 5 (5)           | 2               | iTRAQ               | 4                 | 55.8                                | 63.0      |               | 36.4                   | -24.5         |          |                 | -25.6                |                |                |                  |            |
| 52666                       | 3                    | 3 (2)           | 8 (2)           | DIGE                | 6                 |                                     |           |               |                        | 13.0          |          |                 | 14.1                 |                |                | -156             |            |
| 12114                       | 3                    | 3               | 8 (1)           | iTRAQ               | 4                 |                                     |           | 5.0           | 35.9                   | 13.0          |          |                 |                      |                |                |                  |            |
| 05197                       | 3                    | 3               | 6               | iTRAQ               | 8                 |                                     | 33.0      | 29.1          | 8.2                    |               |          |                 |                      |                |                |                  |            |
| 01043                       | 3                    | 3               | 12              | iTRAQ               | 3                 |                                     |           | 54.8          | 32.3                   |               |          |                 | -25.6                |                |                |                  |            |
| 54864                       | 4                    | 4 (4)           | 10 (6)          | iTRAQ               | 4                 | 85.4                                | 65.7      | 68.0          |                        | -26.0         |          |                 |                      |                |                |                  |            |
| 50768                       | 3                    | 3 (2)           | 12 (5)          | iTRAQ               | 14                |                                     | 82.0      |               | 74.5                   |               |          |                 |                      |                |                | -47.2            |            |
| 14359v                      | 4                    | 4 (3)           | 5               | iTRAQ               | 5                 | 80.0                                | 60.2      | 60.2          | 26.8                   |               |          |                 |                      |                |                |                  |            |
| 91919                       | 2                    | 2 (1)           | 13              | iTRAQ               | 6                 |                                     |           |               | 64.5                   |               |          |                 |                      |                |                | -732             |            |
| 55649v                      | 4                    | 4 (3)           | 4               | iTRAQ               | 4                 | 79.7                                | 58.9      | 55.9          | 27.7                   |               |          |                 |                      |                |                |                  |            |
| 80053                       | 1                    | 1               | 13              | LF-gel/LC           | 15                | -60.0                               |           |               |                        |               |          |                 |                      |                |                |                  |            |
| 80329                       | 1                    | 1               |                 | DIGE                | 6                 |                                     |           |               | -31.8                  |               |          |                 |                      |                |                |                  |            |
| 21543v                      | 2                    | 2               | 11              | 2D-FI               | 21                | 28.6                                |           |               |                        |               |          |                 | 29.5                 |                |                |                  |            |
| 08999                       | 1                    |                 | 10 (2)          | LF-count+           | 10                | -27.9                               |           |               |                        |               |          |                 |                      |                |                |                  |            |
| 70301                       | 1                    | 1 (1)           | 12              | ICAT                | 8                 |                                     |           |               |                        | -295          |          |                 |                      |                |                |                  |            |
| 21205                       | 1                    |                 | 15 (10)         | iTRAQ               | 4                 |                                     |           |               |                        |               |          | 41.5            |                      |                |                |                  |            |
| 81279                       |                      | 3 (2)           | 1 (1)           | iTRAQ               | 5                 |                                     |           |               |                        |               |          |                 |                      |                |                |                  |            |
| 88888                       |                      |                 | 15              | iTRAQ               | 6                 |                                     |           |               |                        |               |          |                 |                      |                |                |                  |            |
| 13056                       |                      |                 | 8               | DIGE                | 10                |                                     |           |               |                        |               |          |                 |                      |                |                |                  |            |
| 23343                       |                      |                 | 15 (14)         | 2D-C                | 3                 |                                     |           |               |                        |               |          |                 |                      |                |                |                  |            |
| 12114                       |                      |                 | 2               | 2D-FI               | 10                |                                     |           |               |                        |               |          |                 |                      |                |                |                  |            |
| 21347                       |                      |                 | 15 (14)         | 2D-FI               | 25                |                                     |           |               |                        |               |          |                 |                      |                |                |                  |            |
| 03280                       |                      |                 | 7 (7)           | DIGE                | 10                |                                     |           |               |                        |               |          |                 |                      |                |                |                  |            |
| 11299                       |                      |                 | 10 (3)          | iTRAQ               | 7                 |                                     |           |               |                        |               |          |                 |                      |                |                |                  |            |

8 respondents did not return quantitative data; those entries were not included in this table

<sup>1</sup> The indicated quantities of proteins were added to an *E. coli* lysate as described in Methods; the quantities shown above for glycerokinase and tryptophanase (both are *E. coli* proteins) represent the amounts added to the mixture. Sample C contained the same quantities of protein as sample B.

<sup>2</sup> v, instrument vendor

<sup>3</sup> True positives, the number of proteins correctly identified as being present at different relative levels in samples A and B; the number of TP results considered to be “high confidence” by the respondent is shown in parenthesis.

<sup>4</sup> False positives, the number of proteins incorrectly identified as being present at different relative levels in samples A and B; the number of FP results considered to be “high confidence” by the respondent is shown in parenthesis.

<sup>5</sup> Methods: LF, label-free; LF-count+, label-free-spectral count+differential peptide ion intensity integration; iTRAQ, isobaric tags for relative and absolute quantitation; ICAT, isotope coded affinity tag; ICPL, isotope coded protein label; 18O, <sup>16</sup>O/<sup>18</sup>O labeling; 2D-S, 2D PAGE/silver stain; 2D-C, 2D PAGE/Coomassie, 2D-FI; 2D PAGE/fluorescent stain, DIGE, differential in-gel electrophoresis.

<sup>6</sup> The amount of time required for the study, as provided by participants in the results survey

<sup>7</sup> % error of ratio = [(observed ratio – expected ratio)/expected ratio] x 100; results that were greater than the expected ratio are shown as positive values; observed ratios that are less than expected are negative numbers.
